# Supplementary material for: Lipidomic analysis probes lipid coronas on hydrophilic nanoparticles from natural lung surfactant
Source: Royal Society of Chemistry journal article supplement (doi:10.1039/d2en00653g), 2022-01-01
Supplement: d2en00653g1.xlsx [file d2en00653g1.xlsx]

## Sheet: Sheet1
	Control				Cationic 1h				Cationic 1h sonication				Cationic 24h				Anionic 1h				Anionic 1h sonication				Anionic 24h				Bulk PS1
LysoPC16:1	2.16488e-06	9.5164e-07	1.34091e-06		7.66103e-05	5.2044e-05	4.58082e-05		1.83125e-05	1.98205e-05	1.97103e-05		2.42046e-05	1.67361e-05	1.84184e-05		2.78122e-06	3.0806e-06	3.11782e-06		3.00812e-06	1.77483e-06	2.68993e-06		1.90806e-06	1.39226e-06	1.24041e-06		0.000105702	7.70332e-05	0.000112988
LysoPC16:0	2.03767e-05	1.58167e-05	1.43253e-05		0.000843191	0.00055203	0.000518892		0.000213551	0.000236741	0.000237785		0.000289205	0.000235475	0.000200356		3.8887e-05	5.72187e-05	3.01387e-05		3.20363e-05	4.07467e-05	3.35997e-05		2.98022e-05	2.35177e-05	2.24396e-05		0.00101863	0.00098203	0.0011846
LysoPC18:1	5.56735e-06	4.65275e-06	4.8038e-06		0.000191952	0.000130475	0.000131699		5.16853e-05	6.77144e-05	5.05266e-05		8.08705e-05	4.89135e-05	5.29283e-05		9.89036e-06	1.37008e-05	1.08513e-05		1.33382e-05	1.36271e-05	1.36366e-05		8.36937e-06	9.43563e-06	6.12706e-06		0.000257361	0.00025276	0.00027648
LysoPC18:0	3.9174e-06	2.09571e-06	2.29103e-06		8.6568e-05	6.38868e-05	6.07776e-05		2.95161e-05	3.11939e-05	2.81356e-05		4.48483e-05	3.11074e-05	2.89326e-05		5.08579e-06	8.52332e-06	4.19907e-06		6.0521e-06	6.5288e-06	3.97751e-06		4.13831e-06	4.5646e-06	5.0355e-06		0.00012654	0.000141847	0.000127354
PC30:1	3.28152e-06	3.21222e-06	2.01737e-06		9.08894e-05	0.000102241	8.94075e-05		3.77046e-05	4.27462e-05	4.45573e-05		4.81697e-05	5.96754e-05	5.6205e-05		6.41982e-06	1.38543e-05	8.80733e-06		7.23517e-06	7.08894e-06	7.65904e-06		3.98341e-06	5.10065e-06	1.25629e-05		0.000201914	0.000189572	0.000182777
PC30:0	9.41463e-05	6.6958e-05	6.8892e-05		0.00266685	0.00276117	0.00331442		0.00129913	0.00115276	0.00130031		0.0014576	0.00153584	0.00140182		0.00016306	0.000319604	0.000256452		0.000174721	0.000161333	0.000197981		9.39247e-05	0.000120614	0.000168709		0.00477846	0.00503649	0.00553308
PC32:2	4.09546e-06	4.32704e-06	3.91966e-06		0.000103257	0.00012617	8.9043e-05		4.85436e-05	5.49486e-05	7.08219e-05		7.35789e-05	5.45232e-05	8.30894e-05		6.32939e-06	1.4058e-05	1.08465e-05		1.18647e-05	9.0633e-06	1.04313e-05		5.41865e-06	6.4309e-06	7.00488e-06		0.000237521	0.000258504	0.00024241
PC32:1	0.000102273	8.7728e-05	0.000100212		0.00237855	0.00277585	0.00331441		0.00145148	0.0015445	0.00158923		0.00190682	0.001587	0.0013408		0.00015808	0.000331458	0.000359672		0.000195363	0.000160381	0.000203235		0.000128797	0.000120903	0.00018249		0.00550882	0.00586361	0.00619734
PC32:0	0.000464887	0.000410701	0.000491978		0.00982119	0.0162608	0.0122894		0.00524732	0.00520506	0.00689646		0.00677836	0.00589581	0.00603324		0.000768935	0.00185795	0.00144669		0.00111216	0.000826864	0.000916979		0.000976593	0.000671721	0.00100905		0.0257963	0.0214311	0.0284051
PC34:3	4.62667e-06	3.00739e-06	3.60488e-06		9.11041e-05	0.000136227	0.000149992		5.147e-05	5.38672e-05	5.28261e-05		8.75456e-05	6.85017e-05	8.06992e-05		6.11881e-06	1.51402e-05	1.11705e-05		1.26635e-05	7.16129e-06	9.11819e-06		5.3735e-06	6.24933e-06	5.93942e-06		0.000202841	0.000269682	0.000173604
PC34:2	6.47954e-05	4.84911e-05	4.93616e-05		0.00123408	0.00240771	0.00173021		0.000787822	0.000882209	0.000864708		0.00178858	0.00125886	0.000799518		9.67091e-05	0.000199363	0.000158006		0.000161419	0.000110722	0.000122662		6.49321e-05	8.27924e-05	0.000111841		0.00337423	0.00367303	0.00311879
PC34:1	0.000200046	0.000106605	0.000118252		0.00387228	0.00432	0.00414786		0.00226419	0.00185566	0.00225696		0.00211037	0.00257311	0.00250826		0.000270417	0.000622982	0.000466787		0.000333482	0.000298364	0.000309813		0.000204151	0.000200498	0.000289072		0.00788808	0.00778488	0.00700518
PC34:0	5.64822e-05	2.99366e-05	3.18987e-05		0.00100566	0.00125592	0.0010987		0.000588539	0.000540835	0.000569344		0.000739289	0.000513826	0.000543762		6.41024e-05	0.000163867	8.88519e-05		0.000126731	6.57397e-05	7.11619e-05		4.53882e-05	4.93529e-05	5.87764e-05		0.00212487	0.00247319	0.00224762
PC36:4	2.58499e-05	2.9101e-05	2.32996e-05		0.000601306	0.000683294	0.000750844		0.000364158	0.000291191	0.000291342		0.000383868	0.000437124	0.00043989		4.43948e-05	0.000103103	7.39731e-05		0.00010896	4.92219e-05	6.62379e-05		4.50624e-05	4.47905e-05	3.852e-05		0.00113707	0.0016705	0.00129987
PC36:3	2.26298e-05	2.65046e-05	2.47552e-05		0.000483735	0.000546528	0.000766443		0.000324839	0.000351355	0.000251948		0.000491991	0.000320448	0.000385539		4.04056e-05	9.18242e-05	6.46575e-05		8.85307e-05	5.71873e-05	5.11731e-05		3.76985e-05	3.54518e-05	3.34965e-05		0.00100349	0.00169262	0.001893
PC36:2	5.58886e-05	3.47043e-05	3.52064e-05		0.0010011	0.00109578	0.0011085		0.000620449	0.000600687	0.000634823		0.000802699	0.000550412	0.000592552		5.63337e-05	0.000193165	0.000121947		0.000165889	0.000107215	9.55265e-05		6.62729e-05	6.34324e-05	5.45876e-05		0.00220406	0.00240712	0.00229913
PC36:1	3.30394e-05	2.40109e-05	2.59793e-05		0.000544038	0.000704772	0.00059016		0.000382829	0.00032382	0.000322976		0.000521926	0.000395555	0.000311083		4.1934e-05	0.000117633	6.66508e-05		0.000126252	5.84672e-05	6.693e-05		4.25614e-05	4.36408e-05	4.46147e-05		0.00113398	0.00145756	0.0012025
PC36:0	9.76154e-05	4.70687e-05	3.89438e-05		8.76388e-05	0.000131606	0.000122056		0.000133453	0.000120092	0.000125975		0.000205125	9.43542e-05	0.000110119		6.2003e-05	0.00011384	0.000106326		0.000128805	0.000104693	9.06386e-05		0.000133427	9.06586e-05	8.95287e-05		0.000161262	0.000530237	0.000192299
PC38:6	3.53236e-06	2.96272e-06	3.01006e-06		5.74855e-05	6.98817e-05	7.56257e-05		3.61989e-05	3.77649e-05	3.02919e-05		5.64783e-05	4.46719e-05	4.10339e-05		3.95997e-06	1.16188e-05	5.93389e-06		1.26101e-05	5.99323e-06	6.49314e-06		5.04907e-06	4.38245e-06	4.79744e-06		0.000114442	0.000174226	0.000138662
PC38:5	1.30966e-05	1.04436e-05	1.0038e-05		0.000205642	0.00026484	0.000281112		0.000126542	0.000145809	0.000120214		0.000170527	0.000135382	0.00014354		1.73373e-05	3.52599e-05	2.21546e-05		4.02755e-05	2.29847e-05	2.10458e-05		1.26435e-05	1.49787e-05	1.21815e-05		0.000489963	0.000661179	0.000398712
PC38:4	2.23794e-05	2.25148e-05	1.86532e-05		0.000397404	0.000500041	0.000517244		0.000306559	0.000341621	0.000296894		0.000376594	0.000231246	0.000328501		3.49459e-05	9.85626e-05	5.07068e-05		0.000108058	4.70288e-05	4.39879e-05		3.29746e-05	3.39793e-05	2.4822e-05		0.000880923	0.00122612	0.000955849
PC38:3	5.75099e-06	7.23125e-06	6.33415e-06		0.000121049	0.000162872	0.00016722		8.74453e-05	9.80429e-05	8.51173e-05		0.000115206	9.86253e-05	8.57723e-05		1.07686e-05	2.74342e-05	1.94675e-05		2.78266e-05	1.33382e-05	1.53564e-05		9.58824e-06	8.9427e-06	1.05816e-05		0.000298856	0.000366078	0.00023076
PC32:2e	7.17992e-05	2.54779e-05	2.91538e-05		0.000569851	0.000625636	0.000372533		6.29787e-05	6.71903e-05	7.4581e-05		6.95011e-05	6.89023e-05	0.000106166		6.00223e-05	6.94686e-05	8.84355e-05		8.4542e-05	6.01839e-05	7.33132e-05		6.40513e-05	6.35407e-05	0.000130487		0.000312642	0.000252765	0.000668633
PC32:1e	5.92634e-05	2.94818e-05	2.91705e-05		0.00064166	0.000792314	0.000616271		0.000162265	0.000195352	0.000171427		0.000194505	0.00019634	0.000235802		5.46225e-05	8.00037e-05	9.02424e-05		7.5176e-05	5.92335e-05	7.83827e-05		5.90036e-05	5.26212e-05	0.000102473		0.00077359	0.00067353	0.000922669
PC34:1p	2.90738e-06	1.73129e-06	1.65374e-06		2.7329e-05	5.13937e-05	3.84508e-05		2.05934e-05	2.48304e-05	2.23829e-05		3.25594e-05	2.66771e-05	2.81036e-05		3.35974e-06	6.7069e-06	5.19137e-06		4.41644e-06	3.07007e-06	4.48742e-06		1.89861e-06	2.76664e-06	3.50244e-06		0.000101781	9.2385e-05	8.71596e-05
PC34:0p	7.50123e-06	5.17785e-06	6.7303e-06		0.0001269	0.000176466	0.00024212		0.000106896	0.000100206	0.000101831		0.000143475	0.000102213	9.82145e-05		1.00198e-05	2.85189e-05	2.40568e-05		1.85157e-05	1.00127e-05	1.4226e-05		9.541e-06	9.23095e-06	1.18035e-05		0.000384477	0.000390237	0.000370121
PC36:3p	3.25058e-06	2.44987e-06	2.44749e-06		4.40374e-05	4.13319e-05	6.69257e-05		2.8619e-05	2.80347e-05	2.85907e-05		3.59982e-05	2.84145e-05	2.60537e-05		3.45018e-06	1.0839e-05	7.78602e-06		9.25824e-06	5.62763e-06	4.48688e-06		4.12304e-06	3.62816e-06	3.73084e-06		8.07867e-05	0.000165884	0.00015491
PC36:2p	1.50128e-06	1.68685e-06	1.5384e-06		2.99451e-05	2.93655e-05	2.66631e-05		1.8503e-05	1.53678e-05	1.51907e-05		1.97484e-05	1.75954e-05	1.80041e-05		1.97931e-06	6.29842e-06	3.7557e-06		4.46911e-06	2.22978e-06	2.80888e-06		2.03894e-06	2.19176e-06	3.27405e-06		5.10463e-05	8.55387e-05	6.13949e-05
PC36:1p	3.21917e-06	2.43512e-06	1.53814e-06		4.14343e-05	6.14514e-05	6.51112e-05		3.71729e-05	2.86903e-05	3.51871e-05		5.38309e-05	3.14612e-05	4.33267e-05		4.01982e-06	9.21316e-06	6.86065e-06		1.12813e-05	4.38502e-06	5.10676e-06		3.24077e-06	4.92177e-06	4.6467e-06		0.000107545	0.000130943	0.000114671
PC36:0p	3.71943e-06	2.37616e-06	1.90204e-06		5.55332e-05	7.9401e-05	6.5658e-05		4.19673e-05	3.61825e-05	3.64106e-05		4.65562e-05	3.11482e-05	3.78123e-05		3.60046e-06	1.16534e-05	7.74013e-06		9.31091e-06	6.83351e-06	5.83715e-06		4.07511e-06	4.8846e-06	7.99612e-06		0.00011897	0.000155892	0.000147496
SM d18:1/14:0	1.16342e-06	5.11585e-07	7.4494e-07		1.92291e-05	2.32747e-05	2.46595e-05		4.81092e-06	7.2525e-06	9.63383e-06		9.56765e-06	6.58993e-06	7.4512e-06		1.72606e-06	1.34123e-06	1.45305e-06		1.74007e-06	1.18141e-06	2.29603e-06		7.0662e-07	8.0708e-07	1.01173e-06		7.29403e-05	7.78211e-05	8.04805e-05
SM d18:1/16:1	5.2933e-07	8.18595e-07	6.8701e-07		1.85686e-05	1.7097e-05	3.42625e-05		8.31784e-06	7.44698e-06	1.17682e-05		7.90532e-06	1.12285e-05	1.01488e-05		2.22709e-06	2.17386e-06	1.97486e-06		1.56694e-06	1.32315e-06	1.04365e-06		8.8218e-07	8.0771e-07	4.7684e-07		7.09448e-05	6.94216e-05	8.49038e-05
SM d18:1/16:0	3.78287e-05	2.68271e-05	3.59597e-05		0.00121943	0.00121915	0.00217937		0.000500608	0.000525992	0.00057056		0.000676514	0.000528903	0.00046129		9.06325e-05	0.000108474	9.77402e-05		8.48565e-05	5.52805e-05	8.27289e-05		3.32272e-05	3.97073e-05	3.63731e-05		0.00504629	0.0051522	0.00541719
SM d18:1/18:1	6.8805e-07	4.6987e-07	2.8622e-07		1.05127e-05	1.21562e-05	1.46931e-05		4.25926e-06	4.30067e-06	6.74844e-06		3.72646e-06	4.148e-06	5.58695e-06		1.39203e-06	1.48139e-06	1.45131e-06		9.8575e-07	4.2593e-07	1.04469e-06		1.00127e-06	8.0771e-07	7.1437e-07		3.7078e-05	3.93996e-05	5.45807e-05
SM d18:1/18:0	7.72494e-06	5.8274e-06	7.1233e-06		0.000211931	0.000236738	0.000341379		0.000100213	8.43371e-05	0.000122799		0.000120642	8.28025e-05	8.77361e-05		1.45299e-05	2.07228e-05	1.62623e-05		1.44426e-05	1.1953e-05	1.45422e-05		6.29346e-06	7.09106e-06	1.19666e-05		0.000926004	0.000907732	0.00106298
SM d18:1/20:1	7.944e-07	1.8433e-07	1.72075e-07		1.10471e-05	1.22555e-05	2.13861e-05		4.55914e-06	6.41778e-06	7.49942e-06		6.04285e-06	5.91904e-06	3.27664e-06		1.16824e-06	1.61947e-06	1.04536e-06		5.2202e-07	6.1445e-07	6.9611e-07		4.7108e-07	2.9748e-07	8.9297e-07		5.6527e-05	5.00511e-05	6.09782e-05
SM d18:1/20:0	5.66078e-06	4.00893e-06	4.43489e-06		0.00018027	0.000182728	0.000292132		5.50675e-05	6.27077e-05	7.82144e-05		7.96053e-05	7.48699e-05	6.87901e-05		1.04657e-05	2.32679e-05	1.01034e-05		1.23545e-05	9.16711e-06	1.44723e-05		2.58743e-06	7.17706e-06	1.27998e-05		0.000710142	0.000580289	0.000877104
SM d18:1/22:1	2.38002e-06	2.57663e-06	3.37669e-06		8.46904e-05	8.54343e-05	0.000118351		3.7829e-05	2.6062e-05	3.10307e-05		3.76634e-05	3.58163e-05	3.35304e-05		5.51219e-06	1.03163e-05	4.87921e-06		6.03197e-06	4.86739e-06	5.91644e-06		2.94206e-06	3.48374e-06	4.6452e-06		0.000498921	0.000288057	0.00033979
SM d18:1/22:0	1.15342e-05	7.9127e-06	7.86695e-06		0.000408409	0.000371681	0.000473694		0.000152273	0.000119706	0.000164445		0.000162179	0.000187632	0.000138349		2.05415e-05	3.17316e-05	1.8644e-05		2.02423e-05	1.55915e-05	2.28903e-05		1.00568e-05	1.52453e-05	1.1371e-05		0.00159272	0.00102721	0.00150505
SM d18:1/24:1	3.78811e-05	3.01181e-05	3.00663e-05		0.00118628	0.00107734	0.00214218		0.000441684	0.000542616	0.000593574		0.000476418	0.000665522	0.000450566		7.15933e-05	0.000164169	8.64747e-05		8.20733e-05	5.80671e-05	8.74566e-05		3.96998e-05	4.90482e-05	3.0184e-05		0.00638571	0.00509246	0.00637928
SM d18:1/24:0	1.76172e-05	1.6562e-05	1.29889e-05		0.000528944	0.000589242	0.000995035		0.000250881	0.000268034	0.000258114		0.000255379	0.0002769	0.000250941		3.59081e-05	6.65648e-05	3.91444e-05		3.56716e-05	2.6979e-05	3.81297e-05		1.63485e-05	2.26338e-05	1.36329e-05		0.00305668	0.00254526	0.0026985
PE30:1	1.8581e-07	2.54545e-07	0		1.65243e-06	1.15102e-06	9.112e-07		3.254e-07	0	2.8455e-07		9.5657e-07	3.7392e-07	6.9473e-07		1.4915e-07	3.486e-07	2.592e-07		1.3488e-07	1.7035e-07	1.2423e-07		0	1.7399e-07	4.586e-07		4.29154e-06	5.41992e-06	3.37781e-06
PE30:0	2.3226e-07	9.2565e-08	7.4975e-08		5.10751e-06	3.21074e-06	2.73359e-06		1.0227e-06	9.8519e-07	1.30893e-06		5.7394e-07	1.55798e-06	2.01472e-06		0	1.9367e-07	2.592e-07		1.07902e-06	2.981e-07	2.8987e-07		0	7.8298e-07	2.293e-07		1.48773e-05	1.54259e-05	2.32692e-05
PE32:2	0	1.15705e-07	1.8745e-08		2.1782e-06	1.02986e-06	2.94386e-06		1.16216e-06	1.47778e-06	1.19511e-06		7.0149e-07	1.55798e-06	1.18104e-06		2.9831e-07	1.162e-07	3.456e-07		2.6975e-07	4.2586e-07	4.141e-08		1.4123e-07	4.35e-08	4.586e-07		6.86646e-06	1.04229e-05	1.31358e-05
PE32:1	4.1807e-07	1.06447e-06	6.5604e-07		8.03682e-06	9.57163e-06	1.24764e-05		4.13729e-06	3.88602e-06	5.40646e-06		7.52505e-06	7.04209e-06	7.43361e-06		1.49153e-06	2.55644e-06	2.03041e-06		1.57356e-06	5.5362e-07	1.32511e-06		9.8863e-07	1.52245e-06	5.7325e-07		3.51906e-05	5.92022e-05	5.92987e-05
PE32:0	4.6452e-07	4.1653e-07	6.74785e-07		5.10751e-06	7.69365e-06	8.90168e-06		3.25405e-06	4.43335e-06	4.38208e-06		7.33373e-06	5.35947e-06	3.47365e-06		1.54125e-06	1.27822e-06	1.2528e-06		7.643e-07	1.27759e-06	4.5551e-07		5.1785e-07	5.6548e-07	1.43312e-06		1.87397e-05	4.25255e-05	3.86569e-05
PE34:2	7.4323e-07	2.01323e-06	1.46204e-06		3.17717e-05	3.10775e-05	3.43451e-05		1.60378e-05	1.6584e-05	2.09429e-05		2.35317e-05	2.3619e-05	2.18145e-05		3.48024e-06	4.99667e-06	9.37442e-06		5.12532e-06	1.57569e-06	4.47223e-06		1.27109e-06	2.26193e-06	2.17834e-06		0.000124312	0.000144253	0.000141492
PE34:1	1.95099e-06	2.03638e-06	1.53702e-06		3.06451e-05	3.11987e-05	3.47656e-05		1.80832e-05	2.39729e-05	2.3447e-05		2.5126e-05	2.50524e-05	2.61913e-05		3.52995e-06	6.93337e-06	8.64002e-06		6.33922e-06	3.19397e-06	5.71452e-06		2.21264e-06	3.56689e-06	3.15286e-06		0.000105715	0.000167601	0.000162885
PE34:0	1.11485e-06	4.62815e-07	2.62415e-07		3.37997e-06	5.87626e-06	5.46717e-06		2.97513e-06	3.0103e-06	2.90242e-06		4.84664e-06	4.30004e-06	3.47365e-06		5.4689e-07	1.93669e-06	1.2096e-06		6.2943e-07	8.517e-08	1.07665e-06		1.8831e-07	0	9.172e-07		1.80245e-05	2.66827e-05	2.85235e-05
PE36:4	8.3614e-07	8.09925e-07	8.43485e-07		1.14919e-05	1.07832e-05	1.04437e-05		4.92756e-06	4.81647e-06	5.17882e-06		8.60917e-06	6.16962e-06	8.82307e-06		1.88927e-06	3.67972e-06	3.15361e-06		1.84332e-06	8.9431e-07	3.06431e-06		7.0616e-07	3.9149e-07	8.5987e-07		7.5245e-05	5.67007e-05	7.16842e-05
PE36:3	6.0388e-07	1.41158e-06	9.7469e-07		1.85523e-05	1.88404e-05	1.80136e-05		7.99566e-06	7.44364e-06	8.30887e-06		1.09049e-05	8.60007e-06	1.06294e-05		3.97741e-06	4.49313e-06	4.70881e-06		2.7425e-06	1.49052e-06	3.60263e-06		1.08278e-06	9.5697e-07	1.31847e-06		8.55447e-05	7.29605e-05	9.15754e-05
PE36:2	1.1613e-06	2.05952e-06	8.62225e-07		2.74153e-05	2.02943e-05	1.63314e-05		1.11103e-05	1.18223e-05	1.013e-05		1.55603e-05	1.43958e-05	1.57704e-05		2.63504e-06	5.15161e-06	5.01121e-06		4.2711e-06	2.25707e-06	5.01056e-06		1.50648e-06	1.56595e-06	1.37579e-06		0.000117016	0.00011632	7.99411e-05
PE36:1	3.7162e-07	3.4711e-07	3.7488e-07		1.26937e-05	8.29945e-06	1.00232e-05		6.08972e-06	5.528e-06	6.65848e-06		9.8846e-06	5.85802e-06	1.10462e-05		2.33673e-06	3.52478e-06	3.75841e-06		3.23705e-06	1.27759e-06	2.52598e-06		1.36525e-06	9.1347e-07	1.31847e-06		5.32151e-05	6.08699e-05	4.84152e-05
PE36:0	0	4.1653e-07	1.12465e-07		2.25331e-06	5.69451e-06	4.83634e-06		1.48756e-06	1.53251e-06	1.99185e-06		2.04069e-06	2.55509e-06	2.01472e-06		6.9605e-07	3.486e-07	2.592e-07		7.643e-07	2.981e-07	4.141e-07		1.4123e-07	5.6548e-07	4.586e-07		1.9455e-05	1.58428e-05	1.87655e-05
PE38:7	9.29e-08	1.15705e-07	1.3121e-07		5.2577e-07	9.087e-07	1.12147e-06		1.0227e-06	4.3786e-07	9.1056e-07		1.14789e-06	7.4783e-07	1.59788e-06		2.9831e-07	6.1974e-07	4.32e-08		1.7984e-07	0	8.282e-08		2.8246e-07	2.6099e-07	4.0127e-07		5.8651e-06	6.2538e-06	5.62963e-06
PE38:6	6.5033e-07	1.61985e-07	1.12465e-07		1.80265e-06	3.08958e-06	1.96257e-06		1.11567e-06	1.09465e-06	1.19511e-06		1.40298e-06	8.7247e-07	1.59788e-06		6.9605e-07	3.8734e-07	9.936e-07		6.2943e-07	3.4069e-07	4.141e-07		9.415e-08	4.35e-08	3.4395e-07		1.07289e-05	7.08759e-06	1.46371e-05
PE38:5	1.0684e-06	7.8678e-07	7.4976e-07		2.33594e-05	1.78105e-05	1.48595e-05		8.32106e-06	8.3741e-06	8.13814e-06		1.30094e-05	8.60007e-06	1.60483e-05		2.83391e-06	5.53895e-06	4.44961e-06		3.59672e-06	1.74604e-06	2.11189e-06		5.6493e-07	6.0898e-07	1.20382e-06		0.000101137	7.5462e-05	9.27014e-05
PE38:4	1.11485e-06	2.12894e-06	1.4433e-06		3.10206e-05	2.52013e-05	2.63546e-05		1.06454e-05	1.09465e-05	1.41706e-05		1.98967e-05	1.78233e-05	1.93135e-05		4.27572e-06	8.25032e-06	8.72642e-06		7.28335e-06	2.25707e-06	3.93391e-06		2.63634e-06	1.30496e-06	1.31847e-06		0.000168944	0.000130078	0.000118223
PE38:3	3.7162e-07	5.09095e-07	7.68505e-07		1.14168e-05	7.57249e-06	7.00919e-06		3.57945e-06	4.21442e-06	3.01624e-06		4.59155e-06	5.73338e-06	6.53046e-06		1.14351e-06	1.62682e-06	2.24641e-06		2.56266e-06	7.6655e-07	8.2819e-07		7.5324e-07	7.3948e-07	2.8662e-07		4.30584e-05	3.54379e-05	3.34026e-05
PE38:2	3.2516e-07	2.7769e-07	1.4995e-07		4.05596e-06	2.60494e-06	2.73359e-06		1.20865e-06	1.47778e-06	1.7073e-06		2.55086e-06	1.05943e-06	7.642e-07		3.9774e-07	6.5848e-07	9.072e-07		4.4959e-07	2.1293e-07	5.3832e-07		1.4123e-07	3.0449e-07	2.293e-07		1.6594e-05	1.41752e-05	2.10173e-05
PE38:1	4.1807e-07	1.85125e-07	1.4995e-07		2.8542e-06	2.54436e-06	2.80368e-06		1.44108e-06	7.6626e-07	1.08129e-06		1.14789e-06	1.49566e-06	1.11157e-06		4.4746e-07	3.8734e-07	2.592e-07		8.9918e-07	0	3.3128e-07		6.1201e-07	2.1749e-07	2.293e-07		7.72477e-06	5.00299e-06	1.16346e-05
PE38:0	6.5033e-07	1.61985e-07	1.8744e-07		8.18704e-06	6.11857e-06	5.88772e-06		3.0681e-06	2.40824e-06	4.4959e-06		5.42059e-06	5.11019e-06	5.83573e-06		4.9718e-07	2.1691e-06	8.208e-07		1.03406e-06	6.3879e-07	2.4846e-07		4.237e-07	7.3948e-07	5.1592e-07		3.23296e-05	3.58549e-05	2.77729e-05
PE40:6	3.2516e-07	1.38845e-07	3.749e-08		4.50663e-06	2.05972e-06	1.61211e-06		1.90594e-06	1.09465e-06	1.59348e-06		1.78561e-06	6.2319e-07	7.642e-07		2.9831e-07	1.9367e-07	2.16e-07		9.4414e-07	2.1293e-07	2.4846e-07		0	1.7399e-07	5.1592e-07		1.35899e-05	1.66767e-05	1.23852e-05
PE40:5	3.2516e-07	1.38845e-07	2.2493e-07		4.2813e-06	3.87712e-06	4.83634e-06		3.34702e-06	3.50289e-06	2.16258e-06		2.16823e-06	2.92901e-06	2.84839e-06		6.4633e-07	1.35569e-06	7.344e-07		7.1934e-07	4.6845e-07	7.0396e-07		6.1201e-07	2.1749e-07	4.0127e-07		2.40326e-05	2.33474e-05	1.98914e-05
PE40:4	6.5033e-07	3.0083e-07	1.68695e-07		4.95729e-06	4.60408e-06	2.80368e-06		1.67351e-06	1.20412e-06	2.44713e-06		4.20893e-06	9.3479e-07	2.77892e-06		8.452e-07	5.4227e-07	9.072e-07		8.9918e-07	2.5552e-07	5.7973e-07		1.8831e-07	0	0		2.26021e-05	1.20906e-05	2.55211e-05
PE34:2p	9.29e-08	1.15705e-07	1.4995e-07		4.13108e-06	3.6348e-06	4.62607e-06		9.7621e-07	2.5177e-06	3.30079e-06		2.23201e-06	2.2435e-06	1.87577e-06		2.9831e-07	8.5215e-07	9.504e-07		3.5967e-07	7.6655e-07	5.7973e-07		1.8831e-07	1.7399e-07	3.4395e-07		2.76089e-05	2.41812e-05	2.58964e-05
PE34:1p	3.2516e-07	6.01655e-07	4.686e-07		9.08837e-06	1.06621e-05	1.47193e-05		5.90377e-06	6.23952e-06	4.83736e-06		4.33647e-06	6.73049e-06	7.15572e-06		8.452e-07	2.59517e-06	2.54881e-06		1.43869e-06	6.3879e-07	2.23612e-06		5.1785e-07	4.7849e-07	2.293e-07		4.80652e-05	4.83624e-05	4.95408e-05
PE36:4p	1.0684e-06	1.01819e-06	6.5604e-07		2.50118e-05	2.18088e-05	2.96489e-05		8.8789e-06	9.57822e-06	9.84545e-06		1.26906e-05	1.26508e-05	1.00736e-05		2.28701e-06	4.95794e-06	5.87522e-06		3.19209e-06	2.34225e-06	3.14713e-06		8.9447e-07	8.6997e-07	7.4522e-07		0.000179243	9.17219e-05	0.000135487
PE36:3p	9.29e-08	3.0083e-07	1.3121e-07		4.2813e-06	6.48205e-06	6.79892e-06		2.32432e-06	2.5177e-06	2.78859e-06		2.16823e-06	2.67973e-06	2.08419e-06		1.14351e-06	1.23948e-06	1.1664e-06		8.0926e-07	2.1293e-07	6.6255e-07		2.3539e-07	3.0449e-07	2.8662e-07		3.27587e-05	2.75166e-05	3.07754e-05
PE36:2p	2.3226e-07	3.9339e-07	2.99905e-07		1.95287e-06	1.99914e-06	2.5934e-06		1.06919e-06	1.47778e-06	1.53657e-06		2.93349e-06	2.55509e-06	2.22314e-06		2.4859e-07	5.4227e-07	4.752e-07		4.496e-08	2.5552e-07	2.0705e-07		2.3539e-07	4.7849e-07	1.1465e-07		1.28746e-05	1.20906e-05	1.68889e-05
PE36:1p	1.8581e-07	3.2397e-07	9.372e-08		1.65243e-06	1.75682e-06	2.10276e-06		1.62702e-06	1.20412e-06	1.7073e-06		6.3772e-07	1.30871e-06	7.642e-07		5.9661e-07	5.4227e-07	1.296e-07		6.2943e-07	1.7035e-07	4.141e-07		3.7662e-07	4.35e-08	1.7197e-07		1.54495e-05	7.50452e-06	7.50619e-06
PE38:6p	4.6452e-07	6.942e-08	9.372e-08		5.25773e-06	4.18002e-06	4.27561e-06		1.85946e-06	1.53251e-06	9.6747e-07		2.42332e-06	1.86958e-06	1.38946e-06		3.4802e-07	7.3594e-07	4.752e-07		4.0463e-07	1.7035e-07	7.4537e-07		4.708e-08	2.1749e-07	1.1465e-07		2.10285e-05	2.58489e-05	1.72643e-05
PE38:5p	4.6452e-07	3.9339e-07	3.56135e-07		1.29941e-05	1.4418e-05	1.48595e-05		4.46269e-06	5.03541e-06	5.40646e-06		6.5047e-06	6.97977e-06	7.9894e-06		7.4577e-07	2.20783e-06	2.50561e-06		1.25885e-06	3.4069e-07	1.2837e-06		7.0616e-07	1.305e-07	0		6.10829e-05	4.29425e-05	5.66717e-05
PE38:4p	1.3936e-07	6.24795e-07	4.49855e-07		1.44963e-05	1.44786e-05	1.63314e-05		7.25188e-06	6.73212e-06	6.08938e-06		7.33373e-06	8.3508e-06	7.9894e-06		1.44181e-06	3.13744e-06	1.08e-06		2.92233e-06	8.0914e-07	1.69779e-06		2.8246e-07	3.0449e-07	9.172e-07		7.89643e-05	6.67068e-05	5.55461e-05
PE40:5p	4.6452e-07	6.942e-08	1.8745e-08		3.68041e-06	2.60494e-06	2.17285e-06		1.44108e-06	2.62717e-06	1.59348e-06		3.12481e-06	2.92901e-06	3.05681e-06		1.4915e-07	8.1341e-07	2.592e-07		3.1471e-07	2.981e-07	6.6255e-07		1.4123e-07	3.0449e-07	2.293e-07		1.81675e-05	2.20966e-05	2.13926e-05
PE40:4p	4.645e-08	2.31405e-07	2.43675e-07		6.53461e-06	4.60408e-06	6.23818e-06		2.46378e-06	2.57244e-06	2.78859e-06		4.2727e-06	2.99133e-06	4.79364e-06		7.4577e-07	6.1974e-07	4.32e-07		1.16893e-06	6.8138e-07	9.9383e-07		3.2954e-07	3.0449e-07	2.8662e-07		2.18869e-05	2.5432e-05	3.2652e-05
PE42:3p	0	4.628e-08	1.4995e-07		8.11193e-06	3.69538e-06	6.23818e-06		2.97513e-06	2.46297e-06	1.42275e-06		3.95384e-06	2.11886e-06	2.50103e-06		0	4.6481e-07	3.888e-07		3.5967e-07	1.7035e-07	2.8987e-07		2.3539e-07	2.6099e-07	4.0127e-07		1.73092e-05	2.5015e-05	2.47704e-05
PE42:2p	0	1.15705e-07	7.4975e-08		3.07953e-06	5.69451e-06	5.11671e-06		2.41729e-06	2.5177e-06	1.65039e-06		3.31612e-06	1.80726e-06	5.5578e-07		2.4859e-07	3.486e-07	5.184e-07		9.4414e-07	8.517e-08	9.5242e-07		0	4.35e-08	1.7197e-07		1.64509e-05	1.79274e-05	2.73976e-05
PE42:1p	4.1807e-07	2.7769e-07	7.4975e-08		3.83063e-06	3.029e-06	2.94386e-06		1.67351e-06	1.64198e-06	1.65039e-06		2.16823e-06	2.80437e-06	9.7262e-07		4.9718e-07	6.5848e-07	3.888e-07		1.3488e-07	2.981e-07	2.4846e-07		0	7.8298e-07	1.1465e-07		1.25885e-05	5.00299e-06	2.25186e-05
PE42:0p	0	0	1.8745e-08		1.80265e-06	2.30204e-06	1.7523e-06		1.30162e-06	8.2099e-07	9.1056e-07		6.3772e-07	1.8696e-07	1.25051e-06		9.944e-08	3.486e-07	1.728e-07		5.3951e-07	2.1293e-07	4.141e-07		3.7662e-07	8.7e-08	1.7197e-07		1.18733e-05	1.08398e-05	1.23852e-05
LPA16:1	5.2642e-07	1.14732e-06	2.98185e-07		2.59535e-06	1.36725e-06	9.1916e-07		7.7534e-07	1.11329e-06	8.8007e-07		1.96896e-06	6.0904e-07	1.1504e-06		2.133e-07	3.3918e-07	5.5587e-07		3.1907e-07	1.08531e-06	4.5322e-07		8.5086e-07	5.9199e-07	5.4725e-07		5.22273e-06	4.73993e-06	4.8345e-06
LPA16:0	5.69493e-06	1.48019e-05	4.5473e-06		3.44444e-05	1.69496e-05	9.68182e-06		1.60003e-05	1.35123e-05	1.01118e-05		2.72919e-05	1.25737e-05	9.47283e-06		2.67257e-06	6.56479e-06	9.0097e-06		5.01253e-06	1.90916e-05	8.87566e-06		2.17107e-05	1.17608e-05	7.45887e-06		4.62036e-05	4.60794e-05	4.61474e-05
LPA18:2	7.86443e-06	1.62402e-05	5.6655e-06		3.92826e-05	1.91198e-05	9.02309e-06		1.69342e-05	1.57826e-05	1.02016e-05		2.96164e-05	1.34774e-05	1.18815e-05		3.00507e-06	7.9981e-06	1.09784e-05		5.95946e-06	1.97083e-05	9.85764e-06		2.42358e-05	1.56877e-05	8.57364e-06		4.6524e-05	5.47794e-05	4.05218e-05
LPA18:1	6.79563e-06	1.72743e-05	5.3673e-06		3.43483e-05	1.79479e-05	1.3098e-05		1.5595e-05	1.67213e-05	1.29855e-05		2.74013e-05	1.611e-05	1.97725e-05		3.50069e-06	7.03526e-06	1.23218e-05		6.6079e-06	1.63537e-05	1.01976e-05		2.2095e-05	1.35763e-05	9.26278e-06		6.45953e-05	6.74392e-05	6.90014e-05
LPA18:0	4.49852e-06	8.4352e-06	2.39375e-06		1.72382e-05	1.31517e-05	8.07329e-06		9.90326e-06	9.67038e-06	8.40556e-06		1.45757e-05	1.18468e-05	8.87966e-06		1.56841e-06	2.87757e-06	5.46604e-06		2.78932e-06	8.36183e-06	5.40093e-06		7.82244e-06	8.26809e-06	5.24958e-06		4.43131e-05	4.42195e-05	5.40584e-05
PA30:2	9.836e-08	5.1165e-08	6.67e-08		9.323e-08	1.2084e-07	8.969e-08		1.1535e-07	1.0918e-07	5.343e-08		1.0705e-07	1.3752e-07	1.7928e-07		9.037e-08	1.1309e-07	1.2432e-07		6.41e-08	8.446e-08	1.4478e-07		9.847e-08	7.522e-08	1.4369e-07		2.9067e-07	5.62835e-07	5.5986e-07
PA30:1	4.798e-08	2.2095e-08	1.3935e-08		7.56e-08	1.0204e-07	1.6308e-07		7.4e-08	4.939e-08	8.548e-08		1.606e-08	1.2033e-07	1.0699e-07		4.519e-08	2.714e-08	2.849e-08		2.991e-08	1.141e-08	3.878e-08		3.425e-08	3.253e-08	2.591e-08		6.5886e-07	3.9732e-07	5.5986e-07
PA30:0	4.87e-07	3.849e-07	2.76755e-07		1.68829e-06	3.28958e-06	2.27227e-06		2.71833e-06	3.52493e-06	3.23766e-06		2.09557e-06	4.16567e-06	5.47381e-06		4.6852e-07	5.1793e-07	7.2005e-07		6.1966e-07	4.7023e-07	6.9548e-07		3.2537e-07	3.8219e-07	5.2765e-07		1.42302e-05	1.19853e-05	2.09017e-05
PA32:2	9.356e-08	3.0235e-08	2.0905e-08		9.323e-08	1.7186e-07	1.7939e-07		2.1329e-07	2.4175e-07	2.1104e-07		1.7129e-07	2.2347e-07	3.9904e-07		4.519e-08	8.821e-08	6.993e-08		6.197e-08	9.587e-08	7.239e-08		2.355e-08	5.489e-08	8.009e-08		9.0109e-07	7.20125e-07	1.49298e-06
PA32:1	1.0316e-07	1.44195e-07	2.887e-08		4.9641e-07	6.5792e-07	4.7294e-07		5.6586e-07	6.8887e-07	6.4379e-07		5.0047e-07	7.3916e-07	1.01785e-06		1.4745e-07	1.7189e-07	1.3727e-07		2.265e-07	1.2783e-07	2.12e-07		7.278e-08	1.9923e-07	1.1071e-07		3.00041e-06	2.82251e-06	4.27362e-06
PA32:0	7.917e-08	1.1512e-07	2.688e-08		3.8554e-07	4.7531e-07	5.0555e-07		3.9611e-07	5.6669e-07	3.8734e-07		4.2286e-07	6.1024e-07	8.27e-07		1.2129e-07	1.2213e-07	1.6059e-07		1.6239e-07	9.815e-08	1.6547e-07		7.92e-08	1.1384e-07	1.1542e-07		2.54825e-06	2.26793e-06	3.80706e-06
PA34:2	4.1263e-07	3.56995e-07	1.6028e-07		1.19441e-06	1.08221e-06	9.8121e-07		9.4238e-07	1.08139e-06	9.323e-07		1.46663e-06	1.33221e-06	1.654e-06		3.4961e-07	4.6365e-07	4.4809e-07		3.5684e-07	4.474e-07	4.602e-07		5.4157e-07	4.5741e-07	2.7796e-07		5.83611e-06	5.0077e-06	4.85214e-06
PA34:1	2.1831e-07	2.4885e-07	1.0851e-07		9.5754e-07	9.1303e-07	1.00295e-06		8.6403e-07	8.6304e-07	9.0291e-07		1.74764e-06	1.89375e-06	1.61352e-06		1.8313e-07	2.6462e-07	2.4606e-07		3.0769e-07	2.3968e-07	3.0508e-07		2.6543e-07	3.029e-07	2.0729e-07		6.71459e-06	5.68641e-06	7.27824e-06
PA36:2	3.7664e-07	3.86065e-07	1.782e-07		1.02054e-06	1.36954e-06	1.32368e-06		1.27102e-06	1.26336e-06	1.06052e-06		2.10895e-06	2.45242e-06	2.57064e-06		2.3783e-07	3.3021e-07	3.6002e-07		2.9487e-07	3.0588e-07	3.8264e-07		3.8745e-07	4.1471e-07	2.332e-07		7.96772e-06	8.60825e-06	6.51312e-06
PA36:1	3.3586e-07	3.17455e-07	1.5331e-07		1.46151e-06	1.92273e-06	1.87815e-06		1.60836e-06	1.75726e-06	1.41581e-06		3.11525e-06	3.45229e-06	3.73306e-06		2.6874e-07	3.9354e-07	3.1599e-07		3.2692e-07	3.1272e-07	4.0591e-07		3.2965e-07	4.9197e-07	3.392e-07		1.02027e-05	1.32352e-05	1.01149e-05
PA36:0	1.4874e-07	8.8375e-08	5.8735e-08		2.8222e-07	3.5178e-07	3.316e-07		3.047e-07	3.9252e-07	2.2706e-07		3.7469e-07	5.4721e-07	5.0025e-07		8.8e-08	1.357e-07	8.288e-08		1.1538e-07	1.3239e-07	1.3703e-07		1.1773e-07	1.0368e-07	1.696e-07		1.42431e-06	2.0279e-06	1.69824e-06
PA38:5	1.6793e-07	1.93035e-07	8.263e-08		8.4415e-07	1.11712e-06	1.2068e-06		9.4456e-07	9.5402e-07	7.3996e-07		1.0625e-06	1.42962e-06	1.66267e-06		1.0702e-07	3.2795e-07	1.839e-07		2.2009e-07	2.0087e-07	2.9474e-07		2.0336e-07	2.2972e-07	1.6018e-07		6.67583e-06	4.62693e-06	6.55044e-06
PA38:4	9.116e-08	1.2675e-07	4.878e-08		6.8288e-07	1.03655e-06	8.752e-07		7.1604e-07	1.09179e-06	6.6783e-07		1.13744e-06	1.58433e-06	1.92581e-06		7.135e-08	1.3344e-07	1.9944e-07		1.7949e-07	1.7805e-07	2.3786e-07		1.0489e-07	9.758e-08	1.06e-07		5.7489e-06	4.83385e-06	6.15852e-06
PA38:3	5.998e-08	6.047e-08	1.4935e-08		2.2679e-07	2.9002e-07	2.8811e-07		2.764e-07	2.5475e-07	2.1905e-07		4.2018e-07	5.4434e-07	5.7832e-07		4.519e-08	5.88e-08	6.475e-08		4.273e-08	1.1642e-07	8.273e-08		6.208e-08	5.895e-08	1.884e-08		1.78281e-06	2.19345e-06	1.9782e-06
PA38:2	4.078e-08	3.9535e-08	2.0905e-08		6.552e-08	1.101e-07	1.4134e-07		5.876e-08	1.0918e-07	1.6562e-07		1.7931e-07	2.3493e-07	2.1398e-07		4.043e-08	5.428e-08	8.029e-08		2.137e-08	4.565e-08	5.171e-08		2.783e-08	3.659e-08	2.12e-08		6.524e-07	7.86345e-07	9.5178e-07
PA38:1	4.8e-09	2.2095e-08	1.6925e-08		6.552e-08	1.1816e-07	2.99e-08		7.617e-08	1.4297e-07	6.678e-08		8.832e-08	8.595e-08	1.1566e-07		1.903e-08	3.619e-08	2.072e-08		3.419e-08	5.25e-08	2.844e-08		2.141e-08	3.456e-08	1.649e-08		3.3912e-07	6.0424e-07	6.5316e-07
PA38:0	6.237e-08	6.628e-08	2.7875e-08		1.3103e-07	1.3695e-07	1.5765e-07		1.5452e-07	1.0918e-07	1.5494e-07		2.1678e-07	1.8622e-07	2.2844e-07		7.848e-08	5.202e-08	7.511e-08		4.06e-08	1.0728e-07	1.1893e-07		3.853e-08	3.863e-08	4.24e-08		8.1712e-07	6.29055e-07	9.3312e-07
PA40:6	9.6e-09	2.093e-08	2.985e-09		1.0583e-07	1.3964e-07	5.98e-08		1.2841e-07	9.098e-08	7.48e-08		8.832e-08	1.3752e-07	1.9374e-07		2.378e-08	4.523e-08	2.849e-08		2.137e-08	3.424e-08	3.361e-08		1.712e-08	1.626e-08	4.71e-09		5.7812e-07	5.62835e-07	4.6656e-07
PA40:5	3.359e-08	2.791e-08	7.965e-09		1.5623e-07	1.8261e-07	1.8483e-07		1.0229e-07	9.098e-08	9.884e-08		1.4185e-07	2.5212e-07	3.3253e-07		3.092e-08	1.357e-08	1.036e-08		4.273e-08	5.022e-08	2.068e-08		3.853e-08	2.643e-08	1.413e-08		8.7848e-07	8.60825e-07	1.269e-06
LPI16:1	9.1196e-07	8.5367e-07	4.929e-07		4.14411e-06	5.30104e-06	3.70784e-06		6.34513e-06	6.45533e-06	4.7392e-06		3.83686e-06	5.94082e-06	5.11676e-06		1.46102e-06	1.37223e-06	1.17422e-06		1.44996e-06	1.0638e-06	1.31788e-06		9.7093e-07	1.01367e-06	9.0697e-07		3.45017e-05	2.2623e-05	3.67602e-05
LPI16:0	4.14925e-06	4.61724e-06	3.04411e-06		3.32411e-05	4.41409e-05	2.88976e-05		5.04592e-05	5.31824e-05	4.28144e-05		3.85151e-05	5.97066e-05	5.65752e-05		5.46644e-06	8.3872e-06	8.65091e-06		8.20407e-06	6.21271e-06	7.09769e-06		3.84107e-06	4.75787e-06	3.941e-06		0.000318412	0.000237126	0.00028769
LPI18:0	3.68823e-06	3.7413e-06	2.42277e-06		2.50664e-05	3.41215e-05	2.05873e-05		3.76725e-05	4.10881e-05	3.24542e-05		3.85186e-05	5.7198e-05	5.44387e-05		4.81413e-06	6.9596e-06	6.08337e-06		6.81481e-06	4.34856e-06	5.85968e-06		3.54585e-06	4.01512e-06	3.97339e-06		0.000207877	0.00024656	0.000240516
LPI20:4	2.34889e-06	2.65195e-06	1.6232e-06		1.23977e-05	1.79615e-05	1.19686e-05		2.05322e-05	2.34824e-05	1.8746e-05		1.88285e-05	2.75544e-05	2.65018e-05		3.21959e-06	4.37205e-06	4.31347e-06		4.29592e-06	2.94795e-06	4.59262e-06		2.58477e-06	2.83402e-06	2.55895e-06		9.63761e-05	0.000106874	0.000120289
PI 30:0	9.127e-08	9.388e-08	8.5285e-08		8.4974e-07	1.3822e-06	7.3143e-07		1.45798e-06	1.71761e-06	1.42578e-06		8.0746e-07	8.4388e-07	1.0856e-06		2.9922e-07	2.6915e-07	3.3584e-07		2.6872e-07	1.7723e-07	2.3311e-07		2.051e-07	1.5591e-07	2.3614e-07		5.94749e-06	2.48169e-06	6.46641e-06
PI 32:1	1.83836e-06	1.52217e-06	1.34469e-06		1.20879e-05	1.46241e-05	1.15027e-05		1.54585e-05	1.56409e-05	1.31885e-05		7.24629e-06	9.44094e-06	1.09859e-05		3.23156e-06	4.02036e-06	3.93058e-06		3.90535e-06	2.384e-06	3.18376e-06		1.98068e-06	2.35159e-06	2.23192e-06		6.12338e-05	2.80791e-05	6.46335e-05
PI 32:0	1.98178e-06	1.59257e-06	1.18548e-06		1.073e-05	1.55122e-05	1.10887e-05		1.74176e-05	1.88786e-05	1.53199e-05		1.29612e-05	2.05998e-05	2.64348e-05		3.49753e-06	5.01283e-06	4.46543e-06		5.52362e-06	2.94998e-06	3.89536e-06		2.53738e-06	2.44254e-06	2.64326e-06		6.6281e-05	6.13017e-05	6.02316e-05
PI 34:2	9.23745e-06	7.86565e-06	5.8023e-06		5.30253e-05	6.15259e-05	4.62801e-05		5.96273e-05	6.48742e-05	5.58528e-05		3.90158e-05	4.4123e-05	5.66737e-05		1.69291e-05	1.9356e-05	1.9572e-05		2.13361e-05	1.30062e-05	1.75874e-05		1.08703e-05	1.14786e-05	1.01617e-05		0.00023195	0.000135252	0.000234824
PI 34:1	2.4316e-05	1.82023e-05	1.45783e-05		0.000121318	0.000143672	0.000100227		0.000138915	0.00015266	0.000127675		0.000130697	0.000167954	0.000204828		4.17842e-05	5.0948e-05	4.87777e-05		4.82018e-05	3.23526e-05	4.15177e-05		2.76358e-05	3.16621e-05	2.64555e-05		0.000489119	0.000460845	0.000503483
PI 34:0	3.18128e-06	2.68558e-06	2.05256e-06		1.60701e-05	1.91933e-05	1.37729e-05		2.06134e-05	2.0315e-05	1.88043e-05		1.98177e-05	2.3252e-05	2.99328e-05		5.73834e-06	7.21085e-06	6.62352e-06		7.9779e-06	5.04242e-06	6.22643e-06		3.97308e-06	4.76165e-06	4.07534e-06		7.4024e-05	7.12084e-05	7.30733e-05
PI 36:4	4.77192e-06	4.37874e-06	3.66731e-06		3.4706e-05	3.79425e-05	2.64763e-05		3.63127e-05	3.79623e-05	3.26839e-05		2.0653e-05	2.27472e-05	2.78358e-05		9.68138e-06	1.18704e-05	1.07282e-05		1.24864e-05	7.63795e-06	1.07598e-05		5.7428e-06	6.6845e-06	5.99494e-06		0.000117193	6.79062e-05	0.000134793
PI 36:3	6.90364e-06	4.90178e-06	3.67585e-06		3.69636e-05	4.3013e-05	3.00369e-05		3.91375e-05	4.47872e-05	3.87944e-05		2.84283e-05	3.22032e-05	4.01949e-05		1.20485e-05	1.46572e-05	1.37135e-05		1.34e-05	9.3702e-06	1.18026e-05		7.2078e-06	9.51031e-06	7.09186e-06		0.00013912	9.28432e-05	0.000132637
PI 36:2	1.75362e-05	1.43566e-05	9.95575e-06		8.14249e-05	9.05935e-05	6.7146e-05		9.18738e-05	9.87343e-05	8.77286e-05		9.26745e-05	0.000110053	0.000138005		3.00282e-05	3.73776e-05	3.58603e-05		3.60319e-05	2.44917e-05	2.89054e-05		1.92208e-05	2.30352e-05	2.12146e-05		0.000320375	0.00030915	0.000292352
PI 36:1	1.33118e-05	9.7734e-06	7.1413e-06		5.39167e-05	5.93487e-05	4.13947e-05		5.58392e-05	6.5581e-05	5.69149e-05		6.90731e-05	8.01789e-05	9.2285e-05		2.21289e-05	2.54735e-05	2.56794e-05		2.54803e-05	1.76885e-05	2.06914e-05		1.38355e-05	1.63702e-05	1.58977e-05		0.000241466	0.000223624	0.000199365
PI 36:0	1.60368e-06	1.23382e-06	8.9835e-07		7.43104e-06	7.90648e-06	5.0648e-06		7.59579e-06	8.21567e-06	7.11436e-06		1.00585e-05	1.0767e-05	1.42056e-05		3.33795e-06	3.56057e-06	2.99769e-06		3.03948e-06	2.42402e-06	2.78503e-06		1.71698e-06	2.66341e-06	2.13289e-06		2.83674e-05	2.91598e-05	2.55924e-05
PI 38:6	7.888e-07	4.5598e-07	4.66235e-07		5.35668e-06	6.50279e-06	3.89865e-06		6.15083e-06	5.47205e-06	5.54309e-06		2.91662e-06	3.59404e-06	4.59291e-06		1.28996e-06	1.71019e-06	1.97773e-06		1.66007e-06	1.04622e-06	1.40478e-06		8.2626e-07	8.9646e-07	9.4457e-07		1.72111e-05	1.13477e-05	2.18886e-05
PI 38:5	4.99357e-06	5.05935e-06	3.96582e-06		4.72938e-05	5.40204e-05	3.39769e-05		5.04824e-05	4.58588e-05	4.56832e-05		3.15398e-05	3.47122e-05	4.37672e-05		1.09182e-05	1.28909e-05	1.26438e-05		1.40449e-05	8.16963e-06	1.05144e-05		6.43428e-06	7.50301e-06	6.58911e-06		0.000130237	0.00010235	0.000175746
PI 38:4	2.25689e-05	1.9178e-05	1.46238e-05		0.000166886	0.000199696	0.000124257		0.000187865	0.000169239	0.000171334		0.000184147	0.000188777	0.000260725		4.3912e-05	5.4358e-05	5.28309e-05		5.45693e-05	3.36504e-05	4.80783e-05		2.51101e-05	3.10254e-05	2.95177e-05		0.000431257	0.000632232	0.000483206
PI 38:3	4.74585e-06	4.69055e-06	3.31196e-06		3.48559e-05	4.14016e-05	2.56621e-05		3.86689e-05	3.54467e-05	3.77687e-05		4.2538e-05	4.18174e-05	5.68593e-05		9.62818e-06	1.21115e-05	1.14746e-05		1.26297e-05	8.18678e-06	1.05205e-05		6.07682e-06	7.43155e-06	6.26917e-06		0.00010134	0.000128307	0.000114452
PI 38:2	9.1266e-07	6.1356e-07	5.48675e-07		4.73188e-06	4.84128e-06	3.79515e-06		5.16149e-06	4.88684e-06	5.10663e-06		5.79147e-06	5.64346e-06	7.36721e-06		1.32986e-06	1.92327e-06	1.55482e-06		2.01239e-06	1.03478e-06	1.64402e-06		9.6104e-07	1.37718e-06	1.27212e-06		1.53801e-05	1.7632e-05	1.68187e-05
PI 38:1	4.3677e-07	3.3528e-07	2.98505e-07		1.82444e-06	3.17978e-06	1.71127e-06		2.90944e-06	2.47762e-06	2.40783e-06		1.62189e-06	1.98162e-06	2.18047e-06		7.2477e-07	1.06537e-06	1.07593e-06		8.3601e-07	5.717e-07	8.3428e-07		5.7428e-07	5.9764e-07	5.7131e-07		8.46664e-06	7.22494e-06	1.13541e-05
PI 38:0	6.2583e-07	4.96215e-07	3.32615e-07		1.85776e-06	3.83149e-06	2.78771e-06		4.56919e-06	4.08884e-06	3.52081e-06		3.24378e-06	4.00091e-06	4.08259e-06		9.043e-07	1.30648e-06	1.29983e-06		9.7335e-07	1.00048e-06	1.06739e-06		6.8562e-07	8.0552e-07	7.2366e-07		1.34418e-05	1.27487e-05	1.05952e-05
LPS18:1	1.47329e-05	8.07455e-06	2.56538e-06		4.48485e-05	2.59745e-05	2.06667e-05		3.47196e-05	3.61943e-05	2.64432e-05		7.54433e-05	3.72639e-05	6.25565e-05		2.01207e-06	5.26759e-06	1.04098e-05		8.40307e-06	7.38042e-06	9.86157e-06		1.86794e-06	5.46179e-06	6.53223e-06		0.0001545	0.000165965	0.000170197
LPS18:0	5.2132e-06	6.9924e-06	8.89335e-07		5.49268e-05	2.87537e-05	2.7052e-05		3.47196e-05	4.29423e-05	2.13124e-05		5.3367e-05	2.87016e-05	3.31901e-05		2.9175e-06	4.38966e-06	3.88799e-06		4.89134e-06	5.35442e-06	6.5238e-06		1.15634e-06	1.44131e-06	3.26612e-06		0.000145799	0.000129886	0.0001142
PS 34:1	7.3295e-07	4.82045e-07	2.1848e-07		6.73365e-06	7.46702e-06	9.9868e-06		5.8225e-06	6.60144e-06	7.98428e-06		6.20578e-06	8.47272e-06	7.41368e-06		3.1895e-07	1.33585e-06	1.26533e-06		7.0386e-07	5.4184e-07	7.8527e-07		2.0085e-07	3.5002e-07	3.7884e-07		1.76897e-05	1.23913e-05	2.0356e-05
PS 34:0	1.3502e-07	1.16355e-07	8.09e-09		1.5334e-06	1.06672e-06	1.33682e-06		4.8891e-07	1.2995e-06	6.3451e-07		8.2984e-07	1.50742e-06	7.467e-07		1.4721e-07	2.6341e-07	1.9302e-07		3.4187e-07	1.5171e-07	3.1835e-07		3.8625e-07	2.3334e-07	9.02e-08		2.23714e-06	1.34173e-06	3.10514e-06
PS 36:2	1.69735e-06	1.84508e-06	1.05194e-06		3.46683e-05	3.42238e-05	3.73522e-05		3.15126e-05	3.22795e-05	3.38407e-05		2.75652e-05	4.52225e-05	4.74689e-05		2.72333e-06	4.49674e-06	4.65383e-06		3.27797e-06	3.31606e-06	3.28966e-06		1.49864e-06	2.33344e-06	1.58753e-06		5.90843e-05	6.82703e-05	7.07283e-05
PS 36:1	5.47783e-06	5.5768e-06	3.42286e-06		8.18039e-05	9.20932e-05	9.11393e-05		7.72036e-05	8.65465e-05	7.3392e-05		7.81496e-05	0.000114823	0.000119952		8.63614e-06	1.29822e-05	1.42189e-05		1.02562e-05	1.05984e-05	1.21824e-05		5.46928e-06	6.88366e-06	5.91714e-06		0.000175653	0.000184291	0.000179926
PS 36:0	9.45118e-06	5.11135e-06	3.71416e-06		1.52007e-05	1.99121e-05	1.68281e-05		1.46674e-05	1.26311e-05	1.41179e-05		1.19064e-05	1.5594e-05	1.97343e-05		9.86286e-06	7.78932e-06	9.90816e-06		8.70773e-06	1.04033e-05	7.53438e-06		8.88371e-06	1.00005e-05	7.16191e-06		1.89935e-05	2.7545e-05	2.70837e-05
PG30:0	1.23006e-06	1.07298e-06	8.3008e-07		2.94352e-05	2.54152e-05	2.66868e-05		1.99262e-05	2.72734e-05	2.26833e-05		1.59729e-05	1.70678e-05	1.52428e-05		2.13038e-06	3.17313e-06	3.41799e-06		2.24305e-06	1.9157e-06	2.45477e-06		1.26758e-06	1.31832e-06	1.59266e-06		8.41965e-05	5.21352e-05	0.000110334
PG32:2	2.1965e-07	2.17595e-07	1.3489e-07		2.16622e-06	1.96989e-06	2.00839e-06		1.87817e-06	2.12449e-06	2.17734e-06		8.9251e-07	1.49199e-06	8.9957e-07		3.738e-08	4.3435e-07	4.2725e-07		2.0176e-07	1.6454e-07	1.7328e-07		1.9014e-07	2.8605e-07	3.8504e-07		7.66899e-06	3.83903e-06	9.94275e-06
PG32:1	2.59191e-06	1.45565e-06	1.27107e-06		3.29848e-05	2.50648e-05	2.67831e-05		2.19657e-05	2.83266e-05	1.97261e-05		1.72655e-05	1.86581e-05	1.76583e-05		3.52571e-06	5.12769e-06	5.02729e-06		4.10633e-06	2.5386e-06	4.14422e-06		1.86334e-06	2.00236e-06	2.90529e-06		9.33263e-05	5.38888e-05	0.000114854
PG32:0	6.07709e-06	3.92424e-06	3.57454e-06		0.00011248	9.52074e-05	0.000100007		8.51044e-05	9.93427e-05	8.34864e-05		9.14981e-05	0.000101685	8.53595e-05		1.01536e-05	1.53348e-05	1.47258e-05		1.25564e-05	8.36798e-06	1.21583e-05		6.37591e-06	5.75834e-06	6.93069e-06		0.000309904	0.000315655	0.000388669
PG34:3	2.1965e-07	2.4761e-07	1.45265e-07		7.57268e-06	4.94286e-06	5.36488e-06		4.56336e-06	5.44741e-06	4.64716e-06		3.46234e-06	3.34469e-06	2.98192e-06		3.4883e-07	9.0489e-07	8.6874e-07		9.3757e-07	7.1692e-07	8.5195e-07		4.0562e-07	2.8605e-07	3.3253e-07		1.88884e-05	1.36499e-05	1.95239e-05
PG34:2	3.30945e-06	2.31853e-06	1.821e-06		5.69225e-05	4.08601e-05	3.90948e-05		3.87078e-05	4.77557e-05	3.76648e-05		3.83781e-05	3.35289e-05	3.14517e-05		5.61872e-06	7.99919e-06	7.98954e-06		5.98147e-06	4.34853e-06	5.93476e-06		4.0309e-06	4.09178e-06	4.21792e-06		0.000170268	0.000110811	0.000159566
PG34:1	8.12719e-06	5.92765e-06	4.5862e-06		0.000137328	9.29716e-05	9.93053e-05		9.51408e-05	0.000106497	8.62812e-05		0.000107179	9.94717e-05	9.42386e-05		1.4053e-05	1.79047e-05	2.05791e-05		1.66627e-05	1.08008e-05	1.49163e-05		8.20123e-06	9.25314e-06	1.13236e-05		0.000392524	0.000325418	0.000389152
PG34:0	7.3218e-07	7.2032e-07	7.67825e-07		1.74936e-05	1.20369e-05	1.1899e-05		1.29858e-05	1.4363e-05	1.01555e-05		1.52035e-05	1.35919e-05	1.32437e-05		1.96842e-06	3.11281e-06	2.79135e-06		2.06503e-06	1.53961e-06	2.5414e-06		1.58447e-06	1.3432e-06	1.75017e-06		5.11266e-05	4.66847e-05	5.21842e-05
PG36:4	6.5896e-07	4.35195e-07	5.188e-07		2.30457e-05	1.5167e-05	1.39074e-05		1.47906e-05	1.21296e-05	1.36978e-05		1.0187e-05	1.31164e-05	9.21229e-06		1.20846e-06	1.58053e-06	1.79444e-06		1.17493e-06	1.02249e-06	1.1985e-06		8.2393e-07	6.716e-07	7.5257e-07		5.65436e-05	4.4315e-05	6.01987e-05
PG36:3	1.18613e-06	7.57835e-07	4.56545e-07		3.12009e-05	1.92518e-05	1.974e-05		1.98675e-05	1.95017e-05	1.72725e-05		1.88505e-05	1.77728e-05	1.66088e-05		1.53238e-06	2.31651e-06	2.70591e-06		1.7802e-06	1.99797e-06	1.67502e-06		8.4928e-07	1.0074e-06	1.24262e-06		7.73797e-05	5.62112e-05	7.42391e-05
PG36:2	2.50405e-06	1.8008e-06	1.41114e-06		5.5084e-05	3.65095e-05	3.46654e-05		3.60226e-05	3.94574e-05	2.66806e-05		4.26253e-05	3.91853e-05	3.89982e-05		3.89946e-06	5.80334e-06	6.5369e-06		4.65226e-06	3.29078e-06	4.93841e-06		3.38443e-06	3.20875e-06	3.85038e-06		0.000129926	0.000145362	0.000138957
PG36:1	9.8112e-07	1.05797e-06	5.34365e-07		2.18807e-05	1.4599e-05	1.54894e-05		1.68008e-05	1.8721e-05	1.60863e-05		1.90506e-05	1.87073e-05	1.87578e-05		1.95596e-06	2.72672e-06	2.2929e-06		2.32613e-06	1.53961e-06	2.35369e-06		1.82531e-06	1.2437e-06	1.80268e-06		5.94042e-05	6.97189e-05	5.51974e-05
PG36:0	1.6108e-07	1.65075e-07	1.66015e-07		3.25844e-06	2.87628e-06	2.04966e-06		1.89284e-06	2.01554e-06	2.92479e-06		2.93914e-06	2.29537e-06	2.69872e-06		2.6163e-07	6.7565e-07	4.4149e-07		2.2549e-07	5.0537e-07	3.0324e-07		4.183e-07	3.2336e-07	2.8003e-07		1.0205e-05	7.82027e-06	1.04851e-05
PG38:2	1.0251e-07	9.004e-08	2.594e-08		1.91137e-06	1.02724e-06	6.878e-07		6.1627e-07	5.8106e-07	1.52739e-06		8.9251e-07	1.22966e-06	8.6626e-07		1.2458e-07	1.9304e-07	3.7028e-07		2.4923e-07	4.701e-08	1.0108e-07		1.6479e-07	1.7412e-07	2.8003e-07		3.53017e-06	3.60206e-06	4.70021e-06
PG38:1	7.322e-08	8.2535e-08	7.263e-08		1.21964e-06	1.11184e-06	6.6029e-07		1.17385e-06	8.8974e-07	7.4745e-07		8.0019e-07	1.01652e-06	1.09948e-06		2.6163e-07	1.9304e-07	1.709e-07		1.1868e-07	1.1753e-07	2.166e-07		1.9014e-07	4.975e-08	1.9252e-07		4.5243e-06	3.17552e-06	5.00149e-06
PG38:0	4.3931e-07	1.65075e-07	5.707e-08		1.47449e-06	1.81278e-06	1.692e-06		1.65807e-06	1.76133e-06	1.20241e-06		1.13872e-06	2.08223e-06	1.96573e-06		2.6163e-07	6.0326e-07	7.1208e-07		1.5428e-07	3.1733e-07	7.22e-08		1.5211e-07	2.9849e-07	1.5752e-07		7.70956e-06	4.07603e-06	8.55679e-06
PC	0.00142758	0.00103633	0.00113049		0.0262999	0.0361631	0.0320964		0.0146377	0.0141388	0.0162904		0.0187109	0.0163577	0.0158789		0.00199333	0.00455342	0.00357317		0.00315981	0.00226442	0.00249508		0.00206181	0.00174771	0.00242649		0.0594679	0.0591129	0.0642437
PE	1.80699e-05	2.09886e-05	1.52576e-05		0.000363159	0.000332463	0.000354595		0.000162563	0.000170492	0.000179551		0.000233659	0.000210577	0.000228427		4.46465e-05	7.73516e-05	7.7933e-05		6.2493e-05	2.81496e-05	5.2673e-05		2.09966e-05	2.27063e-05	2.44777e-05		0.00170045	0.00160888	0.00170053
PS	1.74943e-05	1.31316e-05	8.41555e-06		0.00013994	0.000154763	0.000156643		0.000129695	0.000139358	0.000129969		0.000124657	0.00018562	0.000195316		2.16885e-05	2.68675e-05	3.02392e-05		2.32877e-05	2.50113e-05	2.411e-05		1.64387e-05	1.98009e-05	1.51356e-05		0.000273657	0.000293839	0.000301199
PG	2.86136e-05	2.0439e-05	1.63734e-05		0.000535458	0.000390824	0.000400041		0.000373095	0.000426188	0.000346961		0.000386336	0.000384246	0.000351283		4.73417e-05	6.80836e-05	7.0852e-05		5.54355e-05	3.92308e-05	5.40337e-05		3.17275e-05	3.13164e-05	3.79963e-05		0.00147712	0.00125636	0.00160156
PA	2.87161e-06	2.70246e-06	1.31608e-06		1.00265e-05	1.3588e-05	1.21441e-05		1.15306e-05	1.33822e-05	1.13452e-05		1.54612e-05	2.01293e-05	2.33266e-05		2.46151e-06	3.34961e-06	3.35676e-06		3.1688e-06	3.11126e-06	3.88846e-06		2.78918e-06	3.16728e-06	2.61467e-06		7.12477e-05	6.8419e-05	8.10125e-05
PI	0.000119846	9.74355e-05	7.3935e-05		0.000691331	0.000808187	0.00054981		0.000780056	0.000796836	0.000726867		0.000703232	0.00080269	0.00102204		0.000217412	0.000265122	0.000255542		0.000264377	0.000171185	0.000221652		0.000135595	0.000160753	0.000144023		0.00249241	0.00239369	0.00256151
LPC	3.20263e-05	2.35168e-05	2.27611e-05		0.00119832	0.000798436	0.000757177		0.000313065	0.00035547	0.000336158		0.000439129	0.000332232	0.000300636		5.66443e-05	8.25234e-05	4.83068e-05		5.44348e-05	6.26774e-05	5.39037e-05		4.4218e-05	3.89102e-05	3.48426e-05		0.00150823	0.00145367	0.00170142
LPS	1.99461e-05	1.50669e-05	3.45472e-06		9.97752e-05	5.47283e-05	4.77187e-05		6.94393e-05	7.91366e-05	4.77557e-05		0.00012881	6.59655e-05	9.57466e-05		4.92957e-06	9.65725e-06	1.42978e-05		1.32944e-05	1.27348e-05	1.63854e-05		3.02429e-06	6.9031e-06	9.79835e-06		0.0003003	0.000295852	0.000284397
LPI	1.10983e-05	1.18642e-05	7.583e-06		7.48493e-05	0.000101525	6.51613e-05		0.000115009	0.000124208	9.87538e-05		9.9699e-05	0.0001504	0.000142632		1.49612e-05	2.10911e-05	2.0222e-05		2.07648e-05	1.4573e-05	1.88679e-05		1.09426e-05	1.26207e-05	1.13803e-05		0.000657166	0.000613184	0.000685256
LPA	2.53799e-05	5.7899e-05	1.8272e-05		0.000127909	6.85362e-05	4.07954e-05		5.92081e-05	5.67999e-05	4.25846e-05		0.000100854	5.46169e-05	5.11569e-05		1.096e-05	2.48149e-05	3.83318e-05		2.06883e-05	6.46007e-05	3.4785e-05		7.67148e-05	4.98848e-05	3.10921e-05		0.000206859	0.000217257	0.000214563
SM	0.000123802	9.58175e-05	0.000103707		0.00387932	0.0038271	0.00663714		0.0015605	0.00165487	0.00185439		0.00183564	0.00188033	0.00151767		0.000255697	0.000431862	0.000279173		0.000260488	0.000185451	0.000271217		0.000114216	0.000147106	0.000124069		0.018454	0.0158299	0.0185608
	0.00182673	0.00139519	0.00140157		0.03342	0.0427132	0.0411176		0.0182118	0.0179556	0.0200647		0.0227784	0.0204445	0.0198071		0.00267007	0.00556414	0.00441142		0.00393824	0.00287115	0.0032466		0.00251847	0.00224087	0.00286192		0.0866093	0.0831439	0.091936

## Sheet: Sheet2
		Natural NP 1h without sonication				Natural NP 1h with sonication
LysoPC16:1		3.76584e-06	2.92441e-06	5.22779e-06		8.22399e-06	7.16061e-06	1.01593e-05
LysoPC16:0		5.43748e-05	4.2379e-05	7.76977e-05		0.000139561	0.000116596	0.000141069
LysoPC18:1		1.50297e-05	1.52342e-05	2.15896e-05		3.56292e-05	3.41873e-05	4.42284e-05
LysoPC18:0		1.50634e-05	1.37188e-05	2.45204e-05		4.47906e-05	3.80148e-05	4.67415e-05
PC30:1		1.8153e-05	2.01465e-05	2.24062e-05		6.61704e-05	3.59828e-05	5.45692e-05
PC30:0		0.000314377	0.000393949	0.000530544		0.00156118	0.00118661	0.00119884
PC32:2		1.81604e-05	2.4275e-05	2.12647e-05		4.93788e-05	5.35393e-05	5.52082e-05
PC32:1		0.000387263	0.000391949	0.000384258		0.00102643	0.00112739	0.00117681
PC32:0		0.00135324	0.00142752	0.00189729		0.00688521	0.00586784	0.00595512
PC34:3		1.77763e-05	1.61108e-05	1.68332e-05		4.4841e-05	5.18654e-05	4.82049e-05
PC34:2		0.000237702	0.000268381	0.000198776		0.000378942	0.000622516	0.000611395
PC34:1		0.000557888	0.000564218	0.00036996		0.00126688	0.00149942	0.001255
PC34:0		0.000133023	0.0001412	0.000143777		0.000239702	0.00045942	0.000325013
PC36:4		9.79519e-05	7.8978e-05	0.000138957		0.000338992	0.000378638	0.000323671
PC36:3		9.65671e-05	9.85222e-05	0.00012016		0.000295447	0.000253494	0.000288247
PC36:2		0.000171678	0.000148522	0.000170887		0.000491193	0.000423509	0.000451307
PC36:1		9.6552e-05	0.000108226	9.19988e-05		0.000250664	0.000261066	0.000233501
PC36:0		8.23274e-05	9.91478e-05	2.55808e-05		8.79753e-05	7.00775e-05	6.44299e-05
PC38:6		1.20493e-05	7.76698e-06	1.48684e-05		2.91692e-05	4.23201e-05	3.45493e-05
PC38:5		3.92635e-05	2.57649e-05	4.73703e-05		0.0001314	0.000137163	0.000116255
PC38:4		9.47456e-05	5.99428e-05	7.06211e-05		0.000233166	0.000227342	0.000255565
PC38:3		2.59951e-05	2.18043e-05	2.46903e-05		5.48004e-05	7.92535e-05	6.7816e-05
PC32:2e		1.72048e-05	1.51115e-05	1.19906e-05		3.28815e-05	3.62035e-05	3.69435e-05
PC32:1e		5.19825e-05	5.31072e-05	5.18004e-05		0.000167876	0.000168046	0.000144038
PC34:1p		8.27129e-06	7.44997e-06	6.00711e-06		1.50274e-05	2.08333e-05	1.96102e-05
PC34:0p		2.66573e-05	2.28473e-05	2.59233e-05		7.19491e-05	8.04915e-05	7.00334e-05
PC36:3p		8.07531e-06	5.15309e-06	8.01679e-06		2.53377e-05	3.05939e-05	2.39287e-05
PC36:2p		3.98889e-06	3.24715e-06	4.27151e-06		9.25228e-06	1.12913e-05	1.27811e-05
PC36:1p		8.28642e-06	6.7424e-06	1.02098e-05		2.25085e-05	2.48411e-05	2.42193e-05
PC36:0p		9.14428e-06	8.45603e-06	8.51938e-06		2.44538e-05	2.23641e-05	2.10687e-05
SM d18:1/14:0		3.10884e-06	2.32955e-06	5.63016e-06		1.18297e-05	1.39327e-05	1.37132e-05
SM d18:1/16:1		2.50588e-06	2.46748e-06	5.02031e-06		8.29474e-06	8.33827e-06	1.27601e-05
SM d18:1/16:0		0.000170074	0.00015587	0.000247035		0.000527102	0.000636113	0.000802863
SM d18:1/18:1		1.76755e-06	1.6837e-06	3.58187e-06		5.80995e-06	6.62172e-06	7.11628e-06
SM d18:1/18:0		4.00725e-05	3.18733e-05	7.80652e-05		0.000131872	0.000123518	0.000152544
SM d18:1/20:1		1.92351e-06	1.63286e-06	4.01447e-06		6.43094e-06	8.29773e-06	7.41696e-06
SM d18:1/20:0		2.31455e-05	2.07483e-05	4.82735e-05		0.000102055	9.17875e-05	9.25294e-05
SM d18:1/22:1		1.3007e-05	1.00368e-05	2.92187e-05		5.29738e-05	3.62312e-05	4.93521e-05
SM d18:1/22:0		4.77043e-05	3.14018e-05	0.000110782		0.000203182	0.000150425	0.000174168
SM d18:1/24:1		0.000246259	0.000166726	0.000546852		0.000939292	0.000872008	0.000975285
SM d18:1/24:0		0.000101949	7.85081e-05	0.000257791		0.000426853	0.000368517	0.000479012
LPE16:2		6.9329e-07	2.93075e-06	4.88458e-06		1.9343e-05	3.58203e-06	3.3935e-06
LPE16:1		1.94123e-05	1.46538e-05	9.08532e-05		0.000174087	0.000107461	5.20336e-05
LPE16:0		2.77318e-06	9.76916e-06	9.76915e-06		5.37304e-05	1.25371e-05	1.13117e-05
LPE18:3		9.70614e-06	1.95384e-06	1.56306e-05		5.58796e-05	2.14922e-05	2.94103e-05
LPE18:2		2.21855e-05	2.14922e-05	4.29843e-05		9.8864e-05	0.000103879	7.80505e-05
LPE18:1		3.60514e-05	5.27535e-05	0.000105507		0.000197728	0.000214922	0.00010633
LPE18:0		1.38659e-06	9.7691e-07	1.26999e-05		1.71937e-05	3.58203e-06	6.787e-06
PE30:1		1.0456e-07	1.9762e-07	3.9774e-07		1.0152e-06	7.0722e-07	5.2525e-07
PE30:0		4.1822e-07	1.08692e-06	4.97175e-07		1.90351e-06	1.31341e-06	1.57575e-06
PE32:2		5.2278e-07	7.9049e-07	7.95485e-07		2.91871e-06	1.81856e-06	2.36363e-06
PE32:1		2.92756e-06	2.27265e-06	4.02713e-06		9.89823e-06	7.0722e-06	9.80468e-06
PE32:0		2.09111e-06	5.9287e-07	2.93334e-06		6.85262e-06	6.66807e-06	3.7643e-06
PE34:2		1.68335e-05	1.32407e-05	1.64565e-05		4.0735e-05	3.04104e-05	3.29157e-05
PE34:1		2.09112e-05	1.48216e-05	2.15278e-05		5.24098e-05	4.1827e-05	3.90436e-05
PE34:0		2.71845e-06	2.27265e-06	3.3808e-06		4.82221e-06	4.74848e-06	4.72726e-06
PE36:4		8.88724e-06	9.9799e-06	7.01019e-06		1.78929e-05	1.45485e-05	1.70706e-05
PE36:3		1.58925e-05	1.0474e-05	1.04904e-05		2.62684e-05	2.14187e-05	1.83838e-05
PE36:2		1.81927e-05	1.60074e-05	1.56113e-05		3.14713e-05	2.96022e-05	2.85386e-05
PE36:1		9.41002e-06	6.3239e-06	7.70624e-06		2.17e-05	1.62661e-05	1.64579e-05
PE36:0		2.19567e-06	2.17384e-06	1.6904e-06		6.59882e-06	5.4557e-06	3.50167e-06
PE38:7		3.1367e-07	5.9287e-07	5.46895e-07		1.7766e-06	1.81856e-06	5.2525e-07
PE38:6		9.41e-07	1.87741e-06	2.23729e-06		2.66491e-06	3.94022e-06	3.23905e-06
PE38:5		1.4115e-05	7.90488e-06	1.1087e-05		2.46187e-05	2.47527e-05	2.17979e-05
PE38:4		2.65572e-05	1.92681e-05	1.56611e-05		3.48976e-05	3.29362e-05	3.17777e-05
PE38:3		7.52801e-06	3.656e-06	4.47459e-06		1.20555e-05	9.29489e-06	8.49156e-06
PE38:2		1.15011e-06	2.07503e-06	2.08814e-06		3.42631e-06	3.63713e-06	2.27609e-06
PE38:1		9.41e-07	1.9762e-07	3.48025e-07		1.5228e-06	2.82888e-06	1.83838e-06
PE38:0		2.50934e-06	4.24887e-06	2.78419e-06		9.51753e-06	6.46601e-06	7.44105e-06
PE40:6		1.67289e-06	1.58097e-06	1.54125e-06		2.91871e-06	3.33404e-06	3.93938e-06
PE40:5		1.77745e-06	2.66789e-06	2.13786e-06		5.83741e-06	4.54641e-06	6.30301e-06
PE40:4		1.56834e-06	1.48216e-06	1.74012e-06		6.47192e-06	4.44538e-06	5.42759e-06
PE34:2p		3.45034e-06	3.06314e-06	3.13222e-06		6.21812e-06	6.16292e-06	4.98988e-06
PE34:1p		1.01419e-05	8.89298e-06	1.06893e-05		2.36035e-05	1.90949e-05	2.25858e-05
PE36:4p		2.33159e-05	2.30229e-05	1.97876e-05		4.36537e-05	3.51589e-05	4.14948e-05
PE36:3p		3.76401e-06	3.95244e-06	4.62375e-06		7.48712e-06	8.58767e-06	9.36697e-06
PE36:2p		2.19567e-06	2.17384e-06	2.5356e-06		4.82221e-06	3.63713e-06	3.7643e-06
PE36:1p		1.67289e-06	8.893e-07	8.452e-07		3.42631e-06	1.71753e-06	1.48821e-06
PE38:6p		1.882e-06	1.97622e-06	2.68475e-06		5.32981e-06	5.65776e-06	4.72726e-06
PE38:5p		7.94624e-06	6.62033e-06	8.75031e-06		2.18269e-05	2.00042e-05	2.16228e-05
PE38:4p		1.30695e-05	1.20549e-05	1.0739e-05		2.91871e-05	2.72785e-05	2.42491e-05
PE40:5p		3.5549e-06	2.76671e-06	2.18757e-06		5.71052e-06	7.47632e-06	6.47809e-06
PE40:4p		3.76401e-06	1.97622e-06	4.07685e-06		6.34502e-06	5.55673e-06	5.8653e-06
PE42:3p		1.15011e-06	3.9524e-07	1.6904e-06		2.41111e-06	1.71753e-06	1.66329e-06
PE42:2p		4.1822e-07	4.9405e-07	1.19322e-06		3.17251e-06	2.42475e-06	1.22559e-06
PE42:1p		8.3645e-07	2.9643e-07	8.9492e-07		1.5228e-06	2.72785e-06	1.57575e-06
PE42:0p		5.2278e-07	6.9168e-07	1.09379e-06		1.90351e-06	7.0722e-07	1.48821e-06
LPA16:1		2.8714e-07	3.1231e-07	1.27255e-07		1.0883e-07	2.3997e-07	4.5605e-07
LPA16:0		3.6371e-06	3.12307e-06	1.32027e-06		2.28539e-06	1.86641e-06	3.54702e-06
LPA18:2		1.4357e-06	1.51692e-06	4.93115e-07		6.5297e-07	1.03985e-06	1.31746e-06
LPA18:1		4.45066e-06	3.39076e-06	1.47934e-06		2.41599e-06	2.373e-06	4.35776e-06
LPA18:0		6.50849e-06	7.49537e-06	2.72007e-06		4.11371e-06	4.66601e-06	4.86448e-06
PA30:2		6.325e-08	7.003e-08	3.2665e-08		1.0291e-07	8.038e-08	6.573e-08
PA30:1		1.129e-08	1.03e-08	2.1775e-08		6.24e-09	4.306e-08	2.191e-08
PA30:0		4.066e-08	4.12e-08	3.2665e-08		5.613e-08	8.325e-08	9.038e-08
PA32:2		1.581e-08	1.236e-08	4.083e-08		2.495e-08	1.148e-08	8.22e-09
PA32:1		8.132e-08	7.415e-08	1.0344e-07		1.8087e-07	1.3779e-07	9.038e-08
PA32:0		7.454e-08	4.738e-08	5.7165e-08		1.2162e-07	1.177e-07	8.217e-08
PA34:2		2.4622e-07	1.5655e-07	2.57245e-07		3.2744e-07	5.196e-07	3.6974e-07
PA34:1		2.1459e-07	2.2864e-07	3.21215e-07		4.4595e-07	5.5692e-07	3.3414e-07
PA36:2		2.304e-07	2.2658e-07	4.2874e-07		6.4241e-07	6.6314e-07	5.4777e-07
PA36:1		4.066e-07	2.513e-07	6.2882e-07		8.5135e-07	1.05068e-06	7.0662e-07
PA36:0		7.002e-08	5.562e-08	7.622e-08		1.0603e-07	1.0909e-07	1.2873e-07
PA38:5		1.4457e-07	1.6685e-07	2.2594e-07		3.0561e-07	3.7606e-07	3.0949e-07
PA38:4		1.0391e-07	7.415e-08	1.85105e-07		2.9002e-07	3.8755e-07	2.2732e-07
PA38:3		3.84e-08	6.386e-08	8.1665e-08		1.1538e-07	1.6363e-07	1.0408e-07
PA38:2		3.162e-08	3.708e-08	4.2195e-08		4.678e-08	5.454e-08	6.025e-08
PA38:1		9.04e-09	4.12e-09	1.9055e-08		3.43e-08	6.029e-08	3.287e-08
PA38:0		3.162e-08	1.03e-08	5.7165e-08		8.108e-08	3.445e-08	6.025e-08
PA40:6		1.807e-08	3.09e-08	3.2665e-08		6.24e-09	3.732e-08	3.013e-08
PA40:5		2.033e-08	6.18e-09	2.8585e-08		4.054e-08	4.88e-08	8.217e-08
LPI16:1		6.653e-07	6.9117e-07	4.0624e-07		5.5678e-07	6.4358e-07	6.9133e-07
LPI16:0		5.2745e-07	7.1725e-07	6.10955e-07		1.0958e-06	1.3309e-06	6.9133e-07
LPI18:0		1.07887e-06	9.3242e-07	9.0524e-07		2.03167e-06	1.88075e-06	1.19412e-06
LPI20:4		3.5962e-07	5.0207e-07	4.5422e-07		6.8117e-07	1.24967e-06	5.1421e-07
PI 30:0		6.8874e-07	4.0062e-07	4.8136e-07		6.9174e-07	6.0188e-07	4.7096e-07
PI 32:1		8.23878e-06	7.7162e-06	9.02969e-06		1.21561e-05	1.39741e-05	7.11482e-06
PI 32:0		7.86389e-06	8.47389e-06	8.73922e-06		1.2637e-05	1.36863e-05	8.09037e-06
PI 34:2		3.42977e-05	3.6996e-05	3.51249e-05		4.97339e-05	5.7423e-05	3.70542e-05
PI 34:1		8.60242e-05	9.13654e-05	6.72293e-05		0.00010884	0.000138663	8.9394e-05
PI 34:0		1.26066e-05	1.44135e-05	1.12373e-05		1.75382e-05	1.98883e-05	1.28672e-05
PI 36:4		2.03921e-05	1.74006e-05	2.23004e-05		3.03608e-05	3.61303e-05	2.32115e-05
PI 36:3		2.24583e-05	2.20861e-05	2.28398e-05		3.28241e-05	3.91485e-05	2.57092e-05
PI 36:2		5.62724e-05	6.20274e-05	5.16368e-05		8.34128e-05	9.58497e-05	6.26774e-05
PI 36:1		4.40273e-05	4.59924e-05	3.59309e-05		5.65795e-05	6.8318e-05	4.70669e-05
PI 36:0		4.83865e-06	6.05278e-06	4.39035e-06		7.75259e-06	8.0687e-06	5.72718e-06
PI 38:6		2.99909e-06	2.47336e-06	3.0998e-06		3.97331e-06	5.07674e-06	2.90984e-06
PI 38:5		2.14034e-05	2.0893e-05	2.5284e-05		3.27481e-05	4.31697e-05	2.66343e-05
PI 38:4		8.39315e-05	8.76652e-05	9.09964e-05		0.000126391	0.000167865	9.97567e-05
PI 38:3		1.91977e-05	1.94037e-05	1.94039e-05		2.76275e-05	3.73254e-05	2.00745e-05
PI 38:2		2.57189e-06	3.2746e-06	2.61014e-06		4.17577e-06	4.87611e-06	3.13691e-06
PI 38:1		6.9746e-07	9.667e-07	6.97145e-07		1.11354e-06	1.20376e-06	7.3167e-07
PI 38:0		8.5439e-07	8.9703e-07	6.80545e-07		9.7856e-07	1.19504e-06	6.2234e-07
LPS18:1		3.5803e-06	3.12462e-06	2.64121e-06		1.54188e-05	1.02616e-05	7.01044e-06
LPS18:0		9.11348e-06	1.00899e-05	8.10898e-06		4.68381e-05	2.87323e-05	1.26898e-05
PS 34:1		1.95208e-06	1.67689e-06	2.0814e-06		4.70319e-06	4.08564e-06	2.69095e-06
PS 34:0		2.8784e-07	2.9944e-07	2.65395e-07		6.0668e-07	7.5832e-07	4.4668e-07
PS 36:2		5.51084e-06	5.39499e-06	6.18768e-06		1.37867e-05	1.3201e-05	8.81368e-06
PS 36:1		2.30116e-05	2.04021e-05	2.22147e-05		4.97369e-05	4.80991e-05	3.3419e-05
PS 36:0		1.15084e-05	1.20127e-05	6.3597e-06		1.37867e-05	1.33918e-05	1.30789e-05
PG30:0		5.47785e-06	5.18801e-06	1.03961e-05		1.91852e-05	1.90048e-05	1.63759e-05
PG32:2		1.17672e-06	5.0091e-07	1.26249e-06		1.57737e-06	2.18273e-06	1.98394e-06
PG32:1		1.27005e-05	1.04834e-05	1.59136e-05		3.13639e-05	3.16119e-05	2.54885e-05
PG32:0		4.40257e-05	3.38831e-05	5.45209e-05		0.000110892	0.000124679	0.000100912
PG34:3		2.15056e-06	1.61007e-06	3.4134e-06		5.68585e-06	5.23102e-06	6.5907e-06
PG34:2		1.74885e-05	1.48485e-05	2.5468e-05		5.3337e-05	5.58854e-05	4.44536e-05
PG34:1		4.60545e-05	3.97151e-05	6.04905e-05		0.000120357	0.000121443	0.000110024
PG34:0		6.57342e-06	4.866e-06	9.30502e-06		1.82681e-05	1.86285e-05	1.74183e-05
PG36:4		3.48959e-06	4.32931e-06	6.21893e-06		1.24722e-05	1.19297e-05	1.00878e-05
PG36:3		7.01976e-06	6.2614e-06	1.0022e-05		1.87817e-05	2.1451e-05	1.88306e-05
PG36:2		1.47699e-05	1.10558e-05	2.03245e-05		3.78201e-05	4.09073e-05	3.55763e-05
PG36:1		8.48052e-06	5.68893e-06	1.06766e-05		2.55313e-05	2.41606e-05	2.0142e-05
PG36:0		8.5211e-07	1.53851e-06	1.07545e-06		2.86127e-06	2.70959e-06	3.42985e-06
PG38:2		4.0577e-07	6.0825e-07	7.6373e-07		1.10049e-06	1.50533e-06	4.7076e-07
PG38:1		1.6231e-07	3.2201e-07	3.58485e-07		9.9044e-07	8.6556e-07	6.7252e-07
PG38:0		4.4634e-07	1.4312e-07	4.52005e-07		1.57737e-06	1.0161e-06	1.10966e-06
SM		0.000651518	0.000503278	0.00133626		0.0024157	0.00231579	0.00276676
PC		0.00388832	0.00401854	0.00441699		0.0138008	0.0131721	0.0128681
PE		0.000237864	0.000195053	0.000212096		0.000496815	0.000427767	0.000424315
PI		0.000429364	0.000448498	0.000411712		0.000609535	0.000752464	0.00047325
PS		4.22707e-05	3.97862e-05	3.71089e-05		8.26202e-05	7.95359e-05	5.84492e-05
PG		0.000171274	0.000141042	0.000230662		0.000461801	0.000483211	0.000413566
PA		1.85227e-06	1.56754e-06	2.67316e-06		3.78586e-06	4.53574e-06	3.35233e-06
LPC		8.82337e-05	7.42565e-05	0.000129036		0.000228205	0.000195959	0.000242198
LPE		9.22083e-05	0.00010453	0.000282329		0.000616825	0.000467454	0.000287316
LPS		1.26938e-05	1.32146e-05	1.07502e-05		6.22569e-05	3.89939e-05	1.97002e-05
LPA		1.63191e-05	1.58384e-05	6.14005e-06		9.57689e-06	1.01852e-05	1.45428e-05
LPI		2.63124e-06	2.84291e-06	2.37665e-06		4.36542e-06	5.10489e-06	3.091e-06
		0.00563192	0.0055556	0.00707576		0.0187879	0.017948	0.0175716
